# Supplementary material for: Sex Differences in the Association Between Pain and Injurious Falls in Older Adults: A Population-Based Longitudinal Study
Source: PubMed Central journal article supplement — Am J Epidemiol. 2017 May 23;186(9):1049–56. doi: 10.1093/aje/kwx170 (PMC5860481; doi:10.1093/aje/kwx170), 2017-05-23
Supplement: kwx170welmerwebmaterialfinal.pdf [file kwx170welmerwebmaterialfinal.pdf]

**Web Table 1.** Consequences of the fall in men and women who experienced an injurious fall during the 10-year follow-up period

| Type of Injury              | Men ( <i>n</i> = 203) |      | Women ( <i>n</i> = 548) |      |
|-----------------------------|-----------------------|------|-------------------------|------|
|                             | No.                   | %    | No.                     | %    |
| Unspecified                 | 16                    | 7.9  | 41                      | 7.5  |
| Superficial injury or wound | 55                    | 27.1 | 150                     | 27.4 |
| Fracture                    | 95                    | 46.8 | 296                     | 54.0 |
| Dislocation                 | 6                     | 3.0  | 20                      | 3.7  |
| Intracranial injury         | 25                    | 12.3 | 36                      | 6.6  |
| Other severe injury*        | 6                     | 3.0  | 5                       | 0.9  |

\* For example, nerve injury.

**Web Table 2.** Hazard Ratios and 95% Confidence Intervals for Serious Injurious Falls<sup>a</sup> During 10 Years of Follow-Up in Men and Women Who Participated in the Swedish National Study on Aging and Care in Kungsholmen, Sweden (2001–2004)

| Pain Characteristic                                                     | Men ( <i>n</i> = 1,096)          |            |                      |            |                      |            | Women ( <i>n</i> = 1,838)        |            |                      |            |                      |            |
|-------------------------------------------------------------------------|----------------------------------|------------|----------------------|------------|----------------------|------------|----------------------------------|------------|----------------------|------------|----------------------|------------|
|                                                                         | Fall Rate per 1,000 Person-Years |            | Model 1 <sup>b</sup> |            | Model 2 <sup>b</sup> |            | Fall Rate per 1,000 Person-Years |            | Model 1 <sup>b</sup> |            | Model 2 <sup>b</sup> |            |
|                                                                         | Fall Rate                        | 95% CI     | HR                   | 95% CI     | HR                   | 95% CI     | Fall Rate                        | 95% CI     | HR                   | 95% CI     | HR                   | 95% CI     |
| Presence of pain                                                        | 21.7                             | 16.1, 29.3 | 1.53                 | 1.04, 2.26 | 1.26                 | 0.84, 1.90 | 29.2                             | 25.1, 34.1 | 1.02                 | 0.2, 1.29  | 0.89                 | 0.69, 1.15 |
| No. of pain sites                                                       |                                  |            |                      |            |                      |            |                                  |            |                      |            |                      |            |
| No pain                                                                 | 14.8                             | 12.1, 18.2 | 1.00                 | Referent   | 1.00                 | Referent   | 25.9                             | 22.5, 29.8 | 1.00                 | Referent   | 1.00                 | Referent   |
| Pain at one site                                                        | 19.7                             | 13.0, 30.0 | 1.35                 | 0.81, 2.24 | 1.16                 | 0.68, 1.97 | 30.4                             | 24.3, 38.0 | 1.00                 | 0.75, 1.34 | 0.93                 | 0.69, 1.27 |
| Pain at several sites                                                   | 23.6                             | 15.2, 36.6 | 1.72                 | 1.02, 2.90 | 1.33                 | 0.76, 2.31 | 28.1                             | 22.7, 34.8 | 1.05                 | 0.79, 1.38 | 0.84                 | 0.61-1.15  |
| Intensity of pain <sup>c</sup>                                          |                                  |            |                      |            |                      |            |                                  |            |                      |            |                      |            |
| None or very mild                                                       | 14.0                             | 11.4, 17.2 | 1.00                 | Referent   | 1.00                 | Referent   | 25.3                             | 22.1, 28.9 | 1.00                 | Referent   | 1.00                 | Referent   |
| Mild to moderate                                                        | 25.9                             | 17.4, 38.6 | 2.13                 | 3.11, 3.44 | 1.72                 | 0.99, 2.98 | 28.3                             | 22.6, 35.4 | 1.04                 | 0.78, 1.38 | 0.90                 | 0.66, 1.24 |
| Severe or very severe                                                   | 29.4                             | 18.3, 47.3 | 2.30                 | 1.32, 4.02 | 1.94                 | 1.10, 3.43 | 33.3                             | 26.0, 42.5 | 1.05                 | 0.77, 1.44 | 0.86                 | 0.60, 1.22 |
| No. of daily activities/conditions at least moderately affected by pain |                                  |            |                      |            |                      |            |                                  |            |                      |            |                      |            |
| 0                                                                       | 15.1                             | 12.5, 18.3 | 1.00                 | Referent   | 1.00                 | Referent   | 26.7                             | 23.6, 30.3 | 1.00                 | Referent   | 1.00                 | Referent   |
| 1–2                                                                     | 16.9                             | 9.6, 29.7  | 1.18                 | 0.62, 2.26 | 0.91                 | 0.45, 1.85 | 29.8                             | 23.2, 38.4 | 1.05                 | 0.77, 1.43 | 0.90                 | 0.65, 1.25 |
| 3–6                                                                     | 33.4                             | 20.8, 53.8 | 2.09                 | 1.18, 3.72 | 1.75                 | 0.97, 3.16 | 27.1                             | 20.5, 35.7 | 0.80                 | 0.57, 1.12 | 0.62                 | 0.43, 0.91 |

Frequency of pain<sup>c</sup>

|                       |      |            |      |            |      |            |      |            |      |            |      |            |
|-----------------------|------|------------|------|------------|------|------------|------|------------|------|------------|------|------------|
| Never                 | 14.7 | 11.9, 18.1 | 1.00 | Referent   | 1.00 | Referent   | 25.8 | 22.4, 29.7 | 1.00 | Referent   | 1.00 | Referent   |
| Sometimes             | 15.6 | 8.7, 28.2  | 0.98 | 0.51, 1.88 | 0.80 | 0.37, 1.72 | 27.1 | 20.1, 36.5 | 1.04 | 0.72, 1.48 | 0.93 | 0.64, 1.35 |
| Daily or almost daily | 25.7 | 18.1, 36.3 | 1.88 | 1.22, 2.90 | 1.54 | 0.99, 2.39 | 29.2 | 24.3, 35.1 | 0.99 | 0.78, 1.28 | 0.84 | 0.63, 1.12 |

Abbreviations: *n*, number of participants; HR, hazard ratio; CI, confidence interval.

<sup>a</sup> A serious injurious fall was defined as having a fracture, dislocation of joints, intracranial injury or other severe injury (e.g., nerve injury) as a consequence of the fall.

<sup>b</sup> Results derived from separate flexible parametric survival models for pain characteristics. Model 1 adjusted for demographic characteristics (age and education). In model 2 (for men), additional adjustments were made for chronic obstructive pulmonary disease, cardiovascular disease, vision problems, physical exercise, smoking status, alcohol consumption, and previous injurious falls. In model 2 (for women), additional adjustments were made for cardiovascular disease, musculoskeletal disease, fatigue, number of fall-risk inducing medications, analgesics, and previous injurious falls.

<sup>c</sup> Missing data (for men): intensity of pain, 4; frequency of pain, 5; (for women): intensity of pain, 9; frequency of pain, 21.
